# Supplementary material
Source: Springer Nature journal article supplement (https://www.springermedizin.de/resource/supplementary/13058_2009_2529_MOESM2_ESM.pdf/9701616)

**A**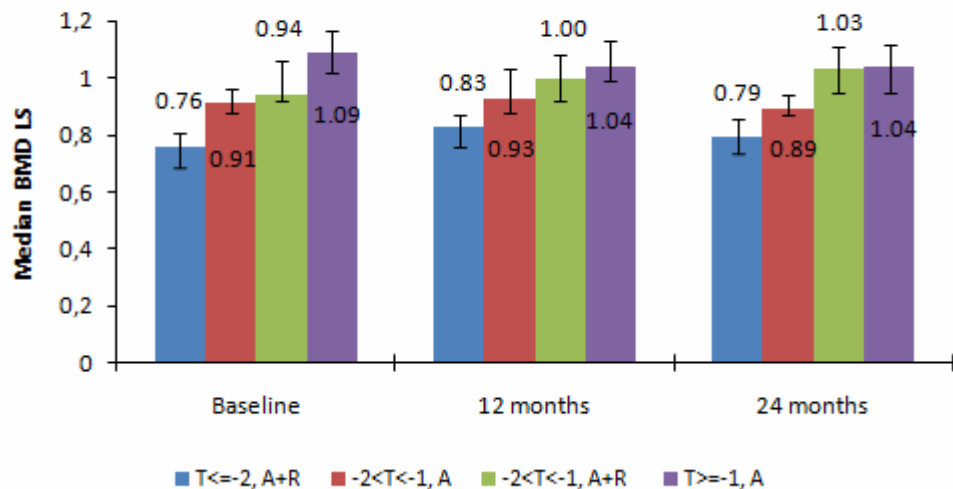**B**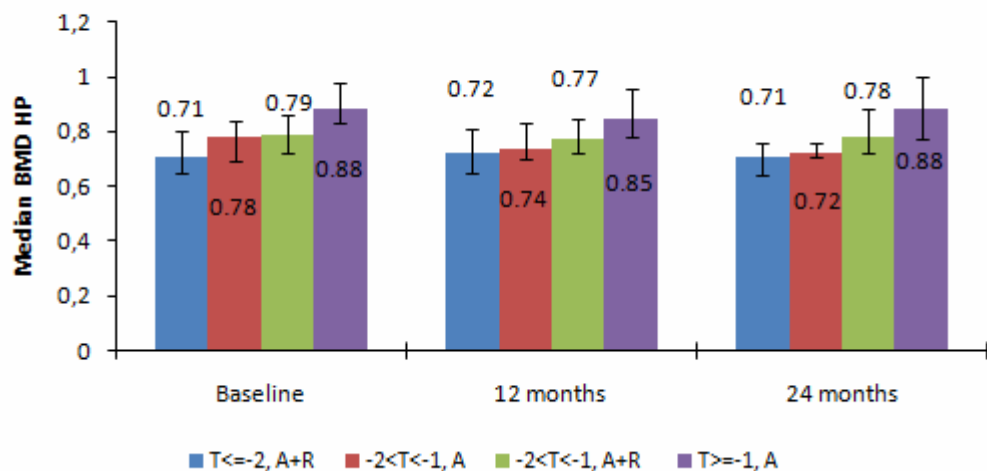

Supplement: MOESM2 [file 9701616]
